# Supplementary material for: Abnormal signal pathways and tumor heterogeneity in osteosarcoma
Source: PubMed Central journal article supplement (PMC9912612; doi:10.1186/s12967-023-03961-7), 2023-02-09

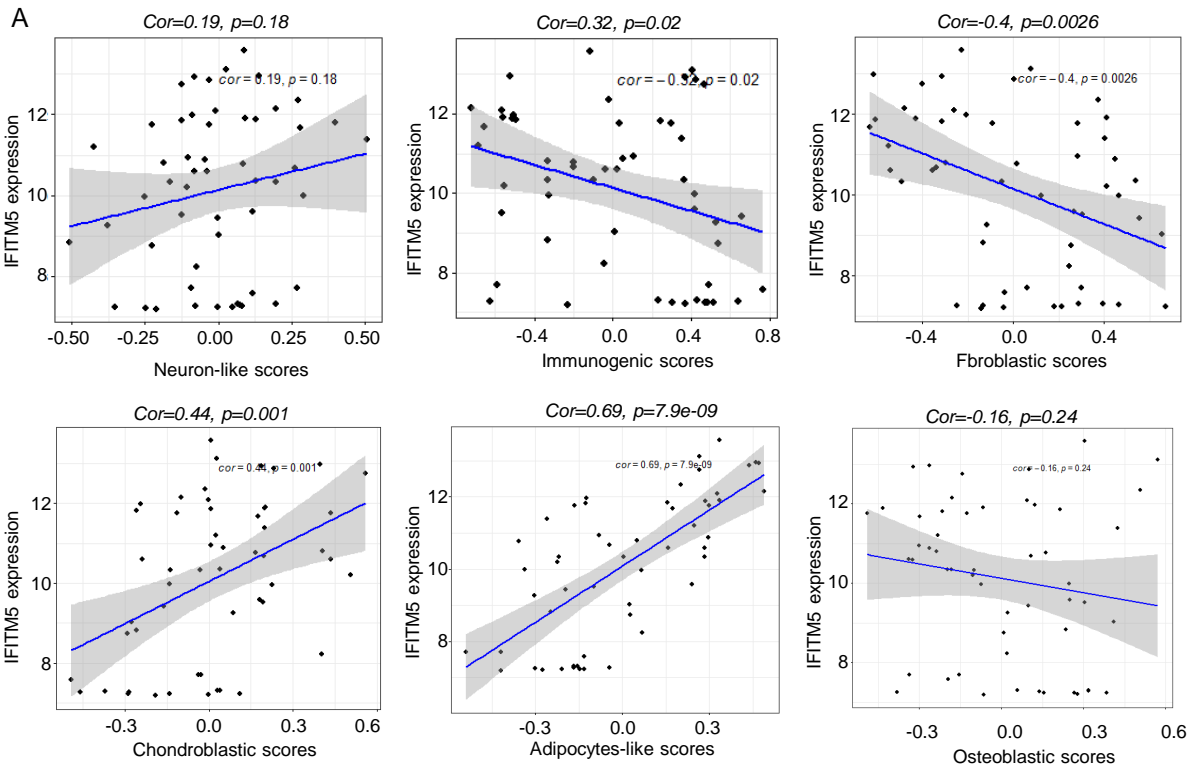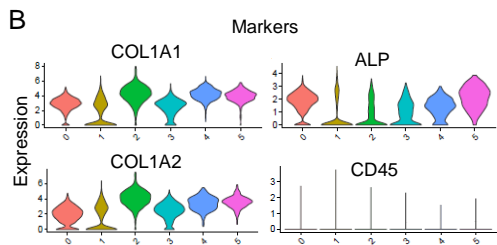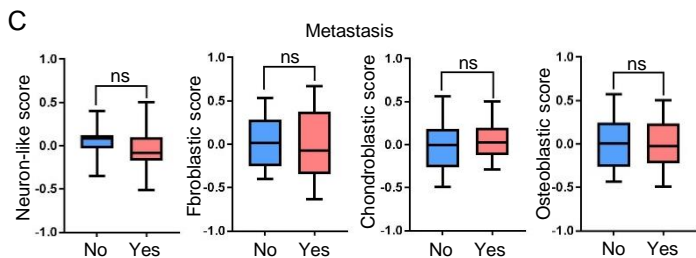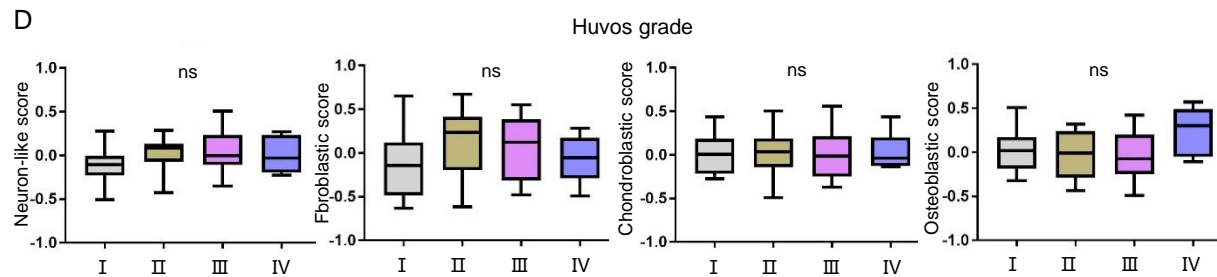

Supplement: 12967_2023_3961_MOESM1_ESM.pdf [file 12967_2023_3961_MOESM1_ESM.pdf]
